# Supplementary material
Source: MDPI journal article supplement (https://www.mdpi.com/2673-7590/4/1/5)
Supplement: s1 [file s1]

## SUPPLEMENTARY

### Part 4. Key values of the results of the first and second rounds of Delphi study

*Table S3. Results from the first round of the Delphi study.*

| Factor, probability        | Number of respondents<br>(experts), who input a value | Average | Standard<br>deviation |
|----------------------------|-------------------------------------------------------|---------|-----------------------|
| Purchase subsidy, 20%      | 24                                                    | 3326    | 2263                  |
| Purchase subsidy, 40%      | 22                                                    | 5364    | 3038                  |
| Purchase subsidy, 60%      | 16                                                    | 7750    | 3211                  |
| Annual taxation, 20%       | 19                                                    | 99      | 112                   |
| Annual taxation, 40%       | 8                                                     | 295     | 314                   |
| Annual taxation, 60%       | 5                                                     | 342     | 352                   |
| Fuel price, 20%            | 20                                                    | 16      | 5                     |
| Fuel price, 40%            | 17                                                    | 25      | 13                    |
| Fuel price, 60%            | 14                                                    | 36      | 18                    |
| Home charging, 20%         | 22                                                    | 39      | 20                    |
| Home charging, 40%         | 15                                                    | 53      | 19                    |
| Home charging, 60%         | 13                                                    | 68      | 20                    |
| Public basic charging, 20% | 20                                                    | 1.5     | 1                     |
| Public basic charging, 40% | 16                                                    | 2.8     | 2                     |
| Public basic charging, 60% | 9                                                     | 5       | 2                     |
| Public fast charging, 20%  | 22                                                    | 8       | 6                     |
| Public fast charging, 40%  | 13                                                    | 15      | 15                    |
| Public fast charging, 60%  | 7                                                     | 25      | 19                    |
| Workplace charging, 20%    | 23                                                    | 30      | 15                    |
| Workplace charging, 40%    | 14                                                    | 51      | 27                    |
| Workplace charging, 60%    | 9                                                     | 62      | 25                    |
| Probability estimate       | 29                                                    | 30.6    | 15                    |

*Table S4. Results from the second round of the Delphi study.*

| Factor                                  | Number of respondents<br>(experts), who input a value | Average | Standard<br>deviation |
|-----------------------------------------|-------------------------------------------------------|---------|-----------------------|
| Purchase subsidy                        | 17                                                    | 56      | 0.12                  |
| Home charging > 11 kW                   | 18                                                    | 50      | 0.12                  |
| Home charging > 3.6 kW                  | 18                                                    | 47      | 0.10                  |
| Public fast charging                    | 16                                                    | 44      | 0.10                  |
| Fuel cost                               | 17                                                    | 62      | 0.14                  |
| Combination 1                           | 18                                                    | 63      | 0.12                  |
| Combination 2                           | 18                                                    | 56      | 0.14                  |
| Combination 3                           | 17                                                    | 66      | 0.13                  |
| 80% -prob.: purchase subsidy, EUR       | 9                                                     | 7111    | 2283                  |
| 80% -prob.: home charging, %            | 11                                                    | 84      | 15                    |
| 80% -prob.: fast-charging, per 100 BEVs | 7                                                     | 18      | 11                    |
| 80% -prob.: use cost difference, c/km   | 7                                                     | 29      | 13                    |
